# Supplementary material for: Impact of type-1 collagen hydrogel density on integrin-linked morphogenic response of SH-SY5Y neuronal cells
Source: Royal Society of Chemistry journal article supplement (doi:10.1039/d1ra05257h), 2021-01-01
Supplement: d1ra05257h1.pdf [file d1ra05257h1.pdf]

1 Supplementary Info

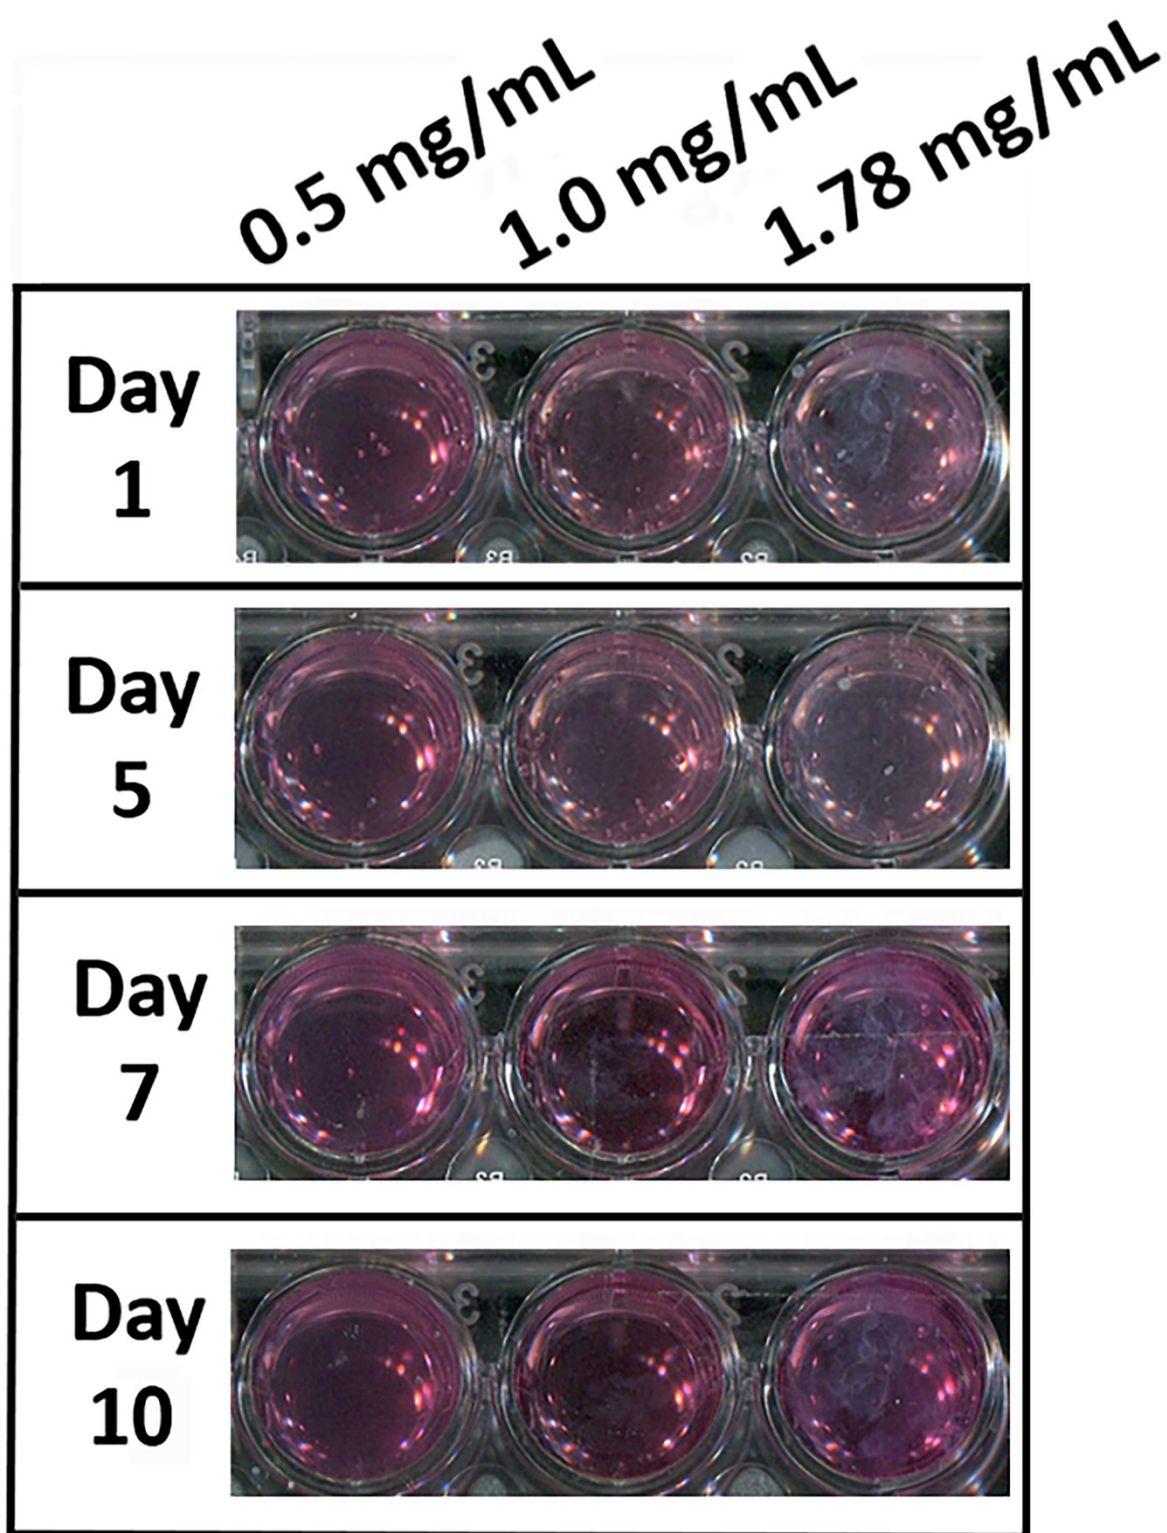

2

3 **Figure S1:** Highlighting no variation in shape of none cell-seeded collagen hydrogels over culture period.

4 Extension of the time for gels to 10 days showed that no change in shape was observed.

5
